# Supplementary material for: Surfactant Provided Control of Crystallization Polymorphic Outcome and Stabilization of Metastable Polymorphs of 2,6-Dimethoxyphenylboronic Acid
Source: MDPI journal article supplement (doi:10.3390/cryst12121738), 2022-12-01
Supplement: s1 [file s1]

## Supplementary Material

# Surfactant Provided Control of Crystallization Polymorphic Outcome and Stabilization of Metastable Polymorphs of 2,6-Dimethoxyphenylboronic Acid

Aina Semjonova \* and Agris Bērziņš

Faculty of Chemistry, University of Latvia, Jelgavas iela 1, LV-1004 Rīga, Latvia

\* Correspondence: aina.semjonova@lu.lv

**Table S1.** List of additives used in the study.

| Additive                                                     | Purity / characteristics                             | Supplier          |
|--------------------------------------------------------------|------------------------------------------------------|-------------------|
| Hydroxypropyl cellulose (HPC)                                | M.W. 100 000                                         | Alfa              |
| Polyethylene glycol (PEG)                                    | M.W. 6 000                                           | Alfa              |
|                                                              | M.W. 600                                             | Alfa              |
| Sodium carboxymethyl cellulose (Na CMC)                      | M.W. 250 000 (DS=1,2)                                | Acros             |
| Glycine                                                      | 99 %                                                 | Acros             |
| 2,2-Bis(hydroxymethyl)-2,2',2''-nitrilotriethanol (BIS-TRIS) | 99 %                                                 | Fluorochem        |
| 4-carboxybenzeneboronic acid (4-COOHPBA)                     | 98 %                                                 | Fluorochem        |
| Phenylboronic acid (PBA)                                     | 98 %                                                 | Fluorochem        |
| NH <sub>4</sub> Cl                                           | 99 %                                                 | Acros             |
| Polysorbate 80                                               | ≤4.0 % H <sub>2</sub> O                              | Alfa              |
| Tween 20 (polysorbate 20)                                    | ≤3.0 % H <sub>2</sub> O                              | Sigma             |
| Poly(acrylic acid) (PAS)                                     | 25 wt % soln. in water                               | Alfa              |
| Poly(acrylic amide) (PAA)                                    | M.W. 5 to 6 000 000                                  | Acros             |
| 4-iodophenylboronic acid (4-IPBA)                            | 98 %                                                 | Fluorochem        |
| (E)-stilbene                                                 | >98 %                                                | TCI               |
| Polyethylene                                                 | M.W. 35 000                                          | Aldrich Chemistry |
| 2-hydroxyphenylboronic acid (2OHPBA)                         | 98 %                                                 | Fluorochem        |
| 2-picolinic acid (2PicA)                                     | 98 %                                                 | Fluorochem        |
| Polystyrene, atactic                                         | M.W. 125 000 – 250 000                               | Alfa              |
| Poly(methyl methacrylate) (PMMA)                             | M.W. 550 000                                         | Alfa              |
| Salicylic acid (SA)                                          | 99 %                                                 | Alfa              |
| 2,6-dimethoxybenzoic acid (2,6MeOBA)                         | 99 %                                                 | Alfa              |
| 1,2,3-trihydroxybenzene (triOHB)                             | 95 %                                                 | Fluorochem        |
| Lactose monohydrate                                          | Ph. Eur.                                             | Sigma             |
| Poly(tetrahydrofuran) (PolyTHF)                              | M.W. 1 000, contains 0,05 – 0,07 % BHT as stabilizer | Aldrich Chemistry |
| Polypropylene glycol (PPG)                                   | M.W. 1 000                                           | Alfa              |

**Table S2.** Approximate solubility of MPBA Form I in different solvents.

| Solvent         | Solubility, mg·mL <sup>-1</sup> |
|-----------------|---------------------------------|
| Water           | 2                               |
| Acetonitrile    | 230                             |
| Toluene         | 12                              |
| Tetrahydrofuran | 190                             |
| Nitromethane    | 135                             |
| Isopropanol     | 100                             |

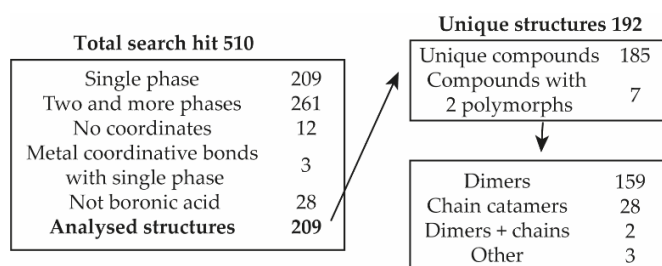

**Figure S1.** CSD search results for phenylboronic acid derivatives.

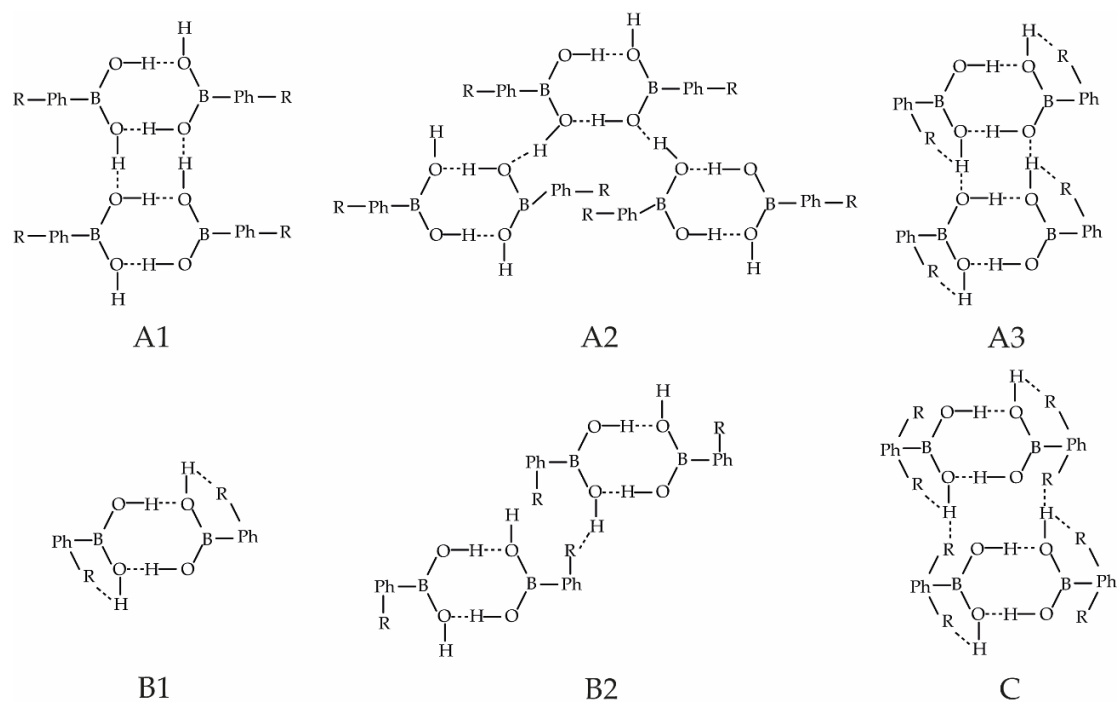

**Figure S2.** Types of dimeric hydrogen bond motifs observed in the crystal structures of phenylboronic acid derivatives in CSD.

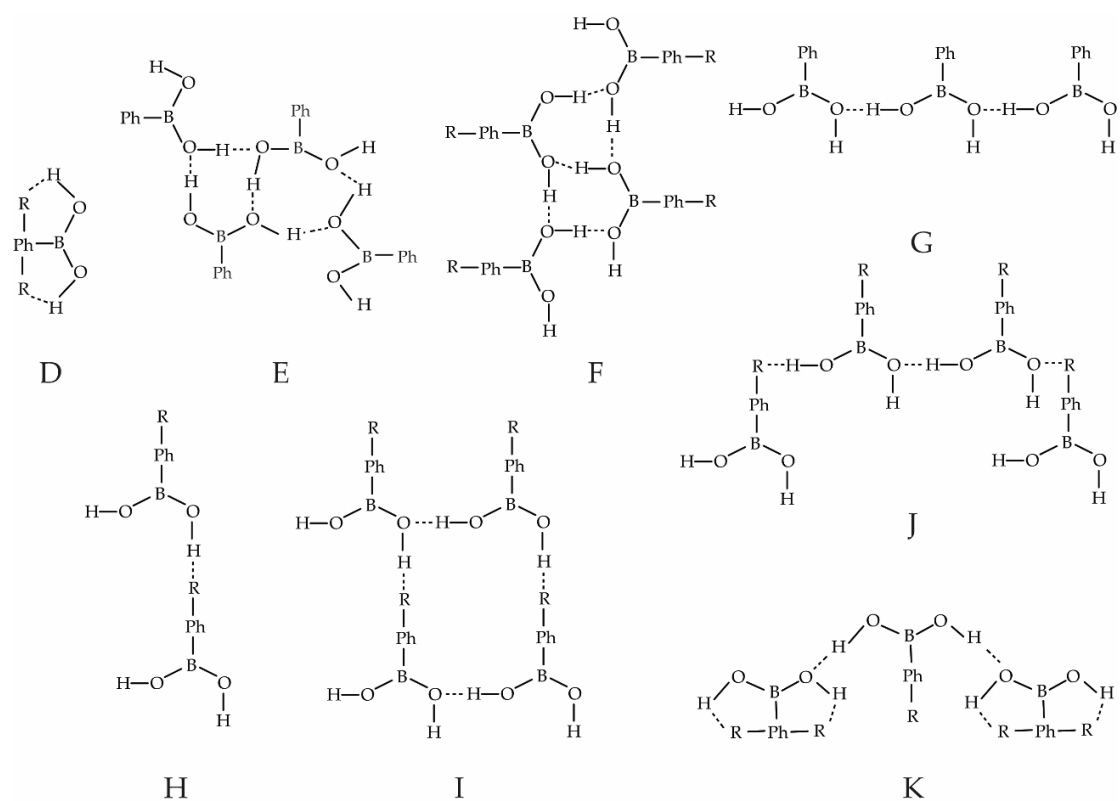

**Figure S3.** Types of non-dimeric hydrogen bond motifs observed in the crystal structures of phenylboronic acid derivatives in CSD.

**Table S3.** Polymorphism observed in phenylboronic acid derivatives.

| Substance                        | Ref. code | Space group | Type of boronic acid hydrogen bond | Structures |
|----------------------------------|-----------|-------------|------------------------------------|------------|
| <b>p-Bromophenylboronic acid</b> | BPHBAC    | $P6/mcc$    | Chain, type G                      |            |
|                                  | BPHBAC01  | $P\bar{1}$  | Dimers, type A1                    |            |

|                                  |          |            |                 |                                                                                       |
|----------------------------------|----------|------------|-----------------|---------------------------------------------------------------------------------------|
| (2,5-Difluorophenyl)boronic acid | DOVJOP   | $P2_1/c$   | Dimers, type A1 | 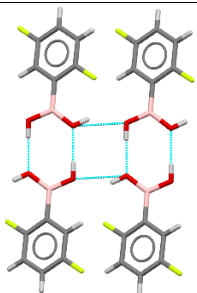   |
|                                  | DOVJOP01 | $P2_1/n$   | Dimers, type A1 |    |
| (3-Acetamidophenyl)boronic acid  | GUKWER   | $P\bar{1}$ | Dimers, type A1 |   |
|                                  | GUKWER01 | $P2_1/c$   | Dimers, type B2 |  |
| 1-Naphthylboronic acid           | ISANOH   | $Pna2_1$   | Dimers, type A2 |  |
|                                  | ISANOH01 | $P2_1/c$   | Dimers, type A2 |  |

|                                        |          |                   |                                         |                                                                                       |
|----------------------------------------|----------|-------------------|-----------------------------------------|---------------------------------------------------------------------------------------|
| 2,6-Diethoxyphenylboronic acid         | UJACAL   | $P2_1/c$          | Intramolecular hydrogen bonding, type D | 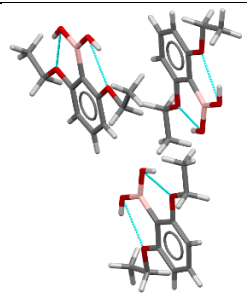   |
|                                        | UJACAL01 | $P2_1/n$          | Chain, type F                           |    |
| 2,6-Dimethoxyphenylboronic acid (MPBA) | UJACIT   | $C2/c$            | Chain, type K                           |    |
|                                        | UJACIT01 | $P\bar{4}n2$<br>1 | Dimers, type A1                         |   |
| Pentafluorophenylboronic acid          | WAJXEL   | $P2_1/c$          | Dimers, type A2                         |  |
|                                        | WAJXEL01 | $P2_1$            | Chain, type F                           |  |

**Table S4.** Types of dimeric structures from CSD search results for phenylboronic acid derivatives.

| Dimer type | Conformation    | Dimer bonding                                                                                    | CSD reference code                                                                                                                                                                                                                                                                                                                                                                                                                                                                                            | Count | %    |
|------------|-----------------|--------------------------------------------------------------------------------------------------|---------------------------------------------------------------------------------------------------------------------------------------------------------------------------------------------------------------------------------------------------------------------------------------------------------------------------------------------------------------------------------------------------------------------------------------------------------------------------------------------------------------|-------|------|
| A1         | <i>syn-anti</i> | $R_2^2(8)$ dimers forming 2 mutual $C(4)$ chains                                                 | AXODAV; BASQOD; BPHBAC01; DITCUH; DOVHON; DOVHUT; DOVJEF; DOVJII; DOVJOP; DOVJOP01; GUKWER; GURQIW; HIRGEV; ISEPII; IYAXAH; NALFIT; NEBTAR; NEBTEV; PEJYUB and PEJYUB01; PEJZAI; PEJZIQ; PEJZOW; QIXBOR; RISYEA; TECCEL; TUNGAK and TUNGAK01; TUNQID; UMUHOZ; WENZUL; WIYMUN and WIYMUN01; XAJNUU; ZAPDAV; ZILBEB; DIMZUX; DINBAG; GISVIO; GUFFOF; GUFFUL; GUFGEW; GURPUH; HUXXII; WIYMOH and WIYMOH01; WIYPEA and WIYPEA02; WURHUP; UJACIT01                                                                 | 45    | 28.3 |
| A2         | <i>syn-anti</i> | $R_2^2(8)$ dimers forming 2 separate $C(4)$ chains                                               | AFOLUC; ISANOH; ISANOH01; NIQYUI; OCAJUY; OLIDOC; PAXSUD; PEJZEM; PEKBAL, PHBORA and PHBORA01-PHBORA03; RISXUP; RISYAW; VOSZUA; WAJXEL; WIYNAU; XARNAG; XICWAK; XUVBAR; XUVBEV; PATVAL                                                                                                                                                                                                                                                                                                                        | 20    | 12.6 |
| A3         | <i>syn-anti</i> | $R_2^2(8)$ dimers forming 2 mutual $C(4)$ chains and intramolecular hydrogen bonds               | EFIDIH; YOWRUA                                                                                                                                                                                                                                                                                                                                                                                                                                                                                                | 2     | 1.3  |
| B1         | <i>syn-anti</i> | Isolated $R_2^2(8)$ dimers and intramolecular hydrogen bonds                                     | BAGYOZ; BASQET; BASQIX; BUDREY; CIQHAN; DECROT; DEWYAG; EFIDON; EJUXAK; FODVAY; FOVMOT; FUQBOK; FUXFAI; FOXFOW; FUXGAJ; GITLAX; GODGUC; GODHAJ; HOXPIU and HOXPIU01; IYONES; KOJQAC; LABMIN; MUCJUQ; MUWYUZ and MUWYUZ01; OCEFAF; OLEXAF; OLEXOT; PULQEV; QAJPOK; REHDOY; ROGKUU; SIZXOR; SIZXUX; TALCOC; TALCUI; TALDAP; TASCEW; TENROV; TENRUB; TUJMOD; UJACUF; UJADAM; UJADEQ; VIVPUM, VIVQAT; XOSDOZ; XOSDUF; XOSFAN; YESZAY; YICHIB and YICHIB01; YICHOH; YIPJIS; ZUCREW; ZUCRIA; QEBJAM; ZUCROG; TIRXUP | 57    | 35.8 |
| B2         | <i>syn-anti</i> | Isolated $R_2^2(8)$ dimers and intermolecular hydrogen bonds with other atoms                    | NAQZOY; XAMZEU; BOTLOO; DAPCOP; EBIXIZ; EHIZOM; ETOLAA; GETPAY; GETPEC; GUF GAS; GUKWE01; GUWMUJ; IRASIF; JESXIR; KERQOP; KUGBUK; MOKKON and MOKKON01; MOYPAU; NALFEP; NUPZAP; OHAZOO; PELMIF; PICBIP; PICBUB; PICCAI; RONLIP; TOWFAP; UCETUS; VOMDAF; WIYMEX; TANBAP; EMULAC; LABCUM; QACYIE;                                                                                                                                                                                                                | 34    | 21.4 |
| C          | <i>syn-anti</i> | Isolated $R_2^2(8)$ dimers and intramolecular and intermolecular hydrogen bonds with other atoms | XECHUJ;                                                                                                                                                                                                                                                                                                                                                                                                                                                                                                       | 1     | 0.6  |

**Table S5.** Types of non-dimeric structures from the CSD search results for phenylboronic acid derivatives.

| Synthon type | Conformation                               | Hydrogen bonding                                        | CSD reference code                                                                     | Count | %    |
|--------------|--------------------------------------------|---------------------------------------------------------|----------------------------------------------------------------------------------------|-------|------|
| D            | <i>anti</i>                                | Intramolecular                                          | PAQMAX; UJACAL; UPUNUQ                                                                 | 3     | 9.7  |
| E            | <i>syn-anti</i>                            | $R_3^3(8)$ trimers + chains                             | BEQMER                                                                                 | 1     | 3.2  |
| F            | <i>syn-anti</i>                            | Two parallel hydrogen bonded C(4) chains                | GURQES; ITIRAE; UJACAL01; VEFCUF; WAJXEL01                                             | 5     | 16.1 |
| G            | <i>syn-anti</i> / <i>anti</i> / <i>syn</i> | C(4) chains                                             | BPHBAC; LIXLAG; UJABUE                                                                 | 3     | 9.7  |
| H            | <i>syn-anti</i> / <i>anti</i> / <i>syn</i> | Only hydrogen bonds with other atoms                    | APOROO; DOBKUA; FUXGIR; GETNEA; GETNIE; GETNOK; HAGDIF; MIDYOO; WUMKAS; XAVHUZ; ZUCRUM | 11    | 35.5 |
| I            | <i>syn-anti</i>                            | C(4) chains and hydrogen bonds with other atoms         | HIJZEI; NALDUD; VEXFUZ02; PEYLOV; QACYEA                                               | 5     | 16.1 |
| J            | <i>syn-anti</i> / <i>anti</i>              | C(2) chains or chains involving other functional groups | MAGMAM; ROKJUX                                                                         | 2     | 6.5  |
| K            | <i>syn-anti</i> and <i>anti</i>            | Isolated and intramolecular hydrogen bonds              | UJACIT                                                                                 | 1     | 3.2  |

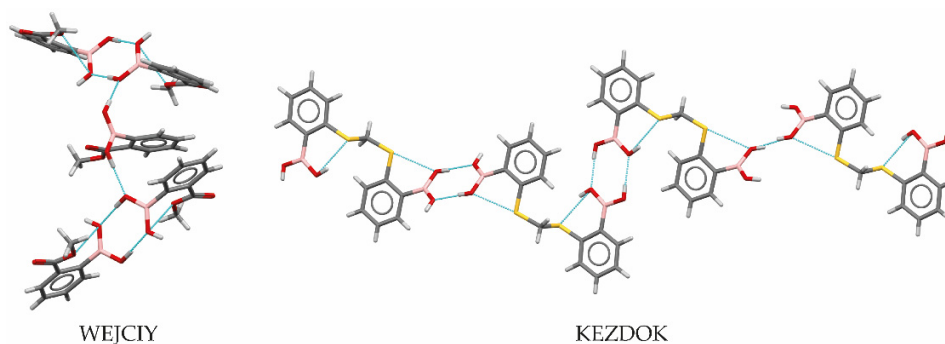

**Figure S4.** Hydrogen bonding phenylboronic acid derivative structures containing chains and dimers.

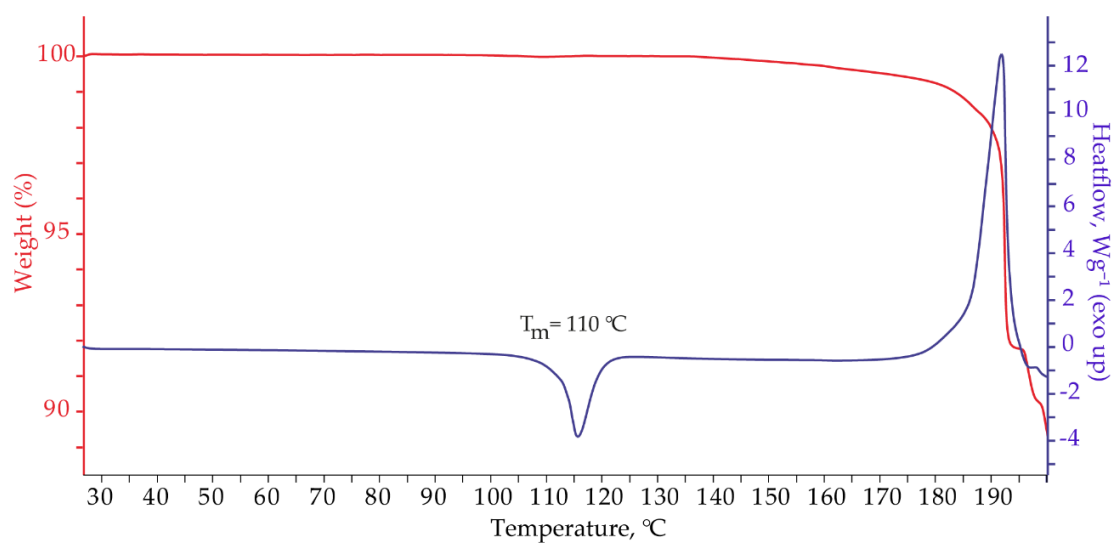

**Figure S5.** DSC /TG curves of MPBA Form I (heating rate  $10\text{ °C min}^{-1}$ ). The onset temperatures were used to characterize the thermal process occurring in the DSC traces.

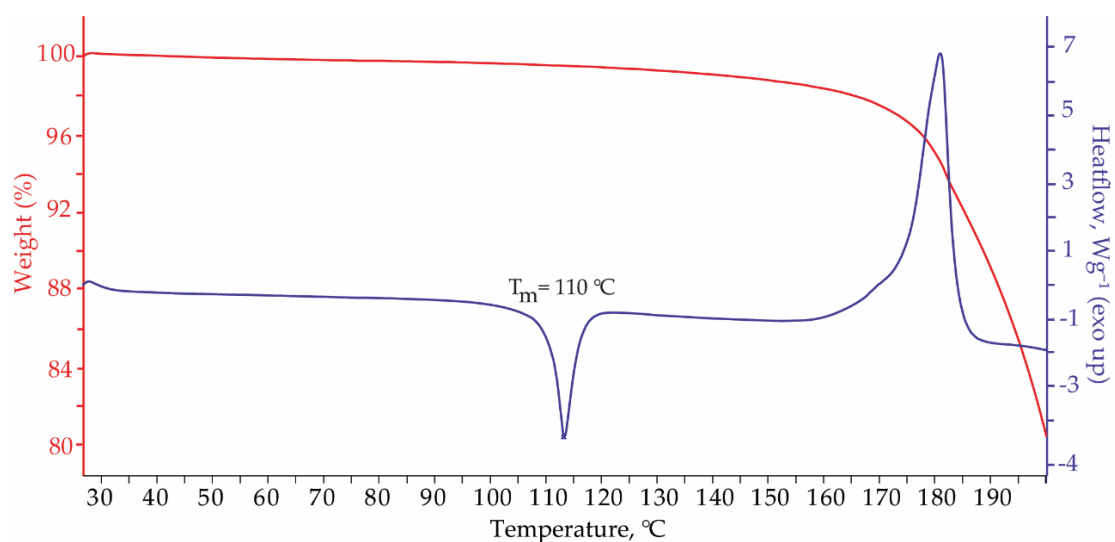

**Figure S6.** DSC /TG curves of MPBA Form II (heating rate  $10\text{ °C min}^{-1}$ ). The onset temperatures were used to characterize the thermal process occurring in the DSC traces.



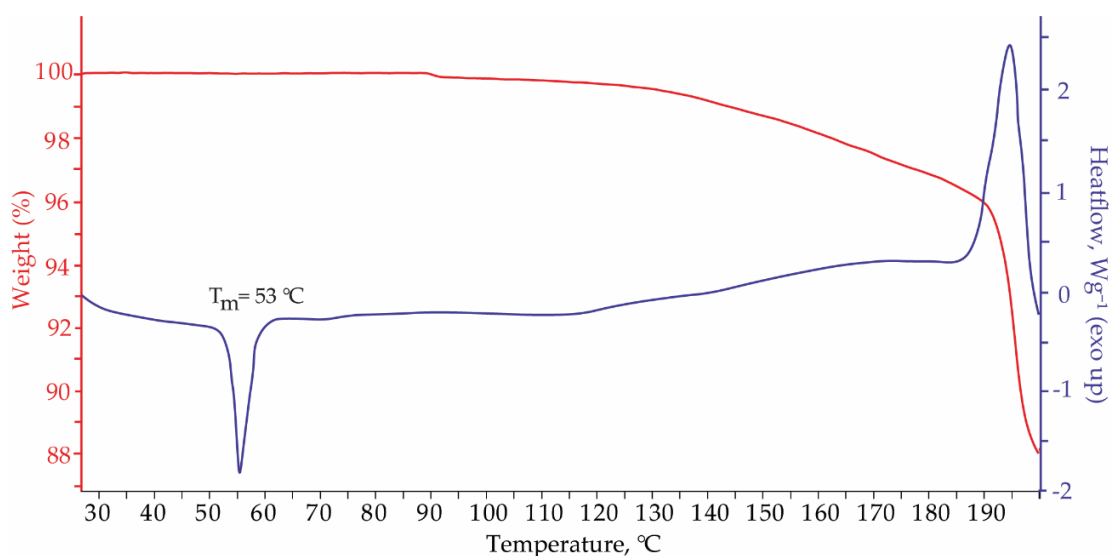

**Figure S7.** DSC /TG curves of MPBA Form III (heating rate 10 °C min<sup>-1</sup>). The onset temperatures were used to characterize the thermal process occurring in the DSC traces.

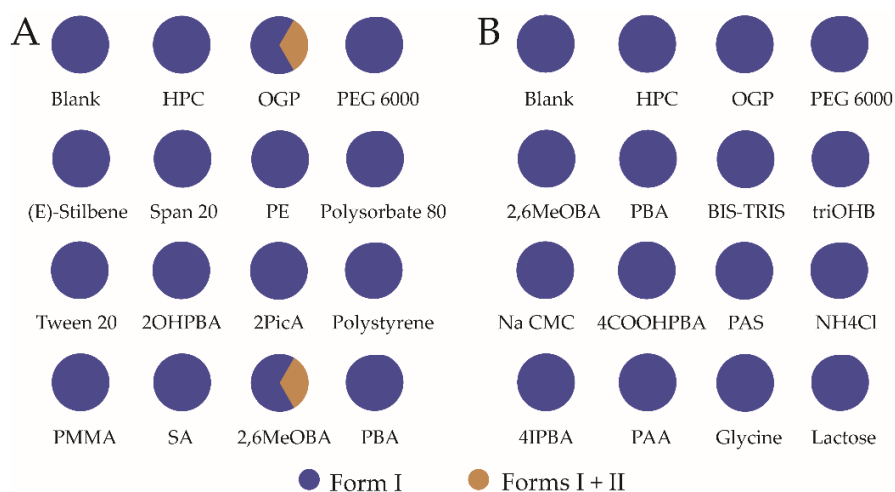

**Figure S8.** Results of the crystallization in the presence of additives from toluene (A) and water (B). Each 1/3 of the circle represents one of the parallel experiments.

Abbreviations: HPC – hydroxypropyl cellulose; OGP - octyl β-D-glucopyranoside; PEG – polyethylene glycol; PE – polyethylene; 2,6MeOBA - 2,6-dimethoxybenzoic acid; PBA – phenylboronic acid; BIS-TRIS – bis(2-hydroxyethyl)amino-tris-(hydroxyethyl)methane; PAA -poly(acrylic amide); 2OHPBA – 2-hydroxyphenylboronic acid; 2PicA – 2-piconilic acid; Na CMC – sodium carboxymethyl cellulose; 4COOHPBA – 4-carboxyphenylboronic acid; PMMA – polymethylmethacrylate; SA – salicylic acid; 4IPBA – 4-iodinephenylboronic acid; triOHB – 1,2,3-trihydroxybenzene; PAS – poly(acrylic acid).

**Table S6.** Intramolecular energies and torsion angle data of MPBA polymorphs.

|                                                           | Form I                                                                              |                                                                                     | Form II                                                                              |                                                                                       |
|-----------------------------------------------------------|-------------------------------------------------------------------------------------|-------------------------------------------------------------------------------------|--------------------------------------------------------------------------------------|---------------------------------------------------------------------------------------|
| Asymmetric unit                                           | 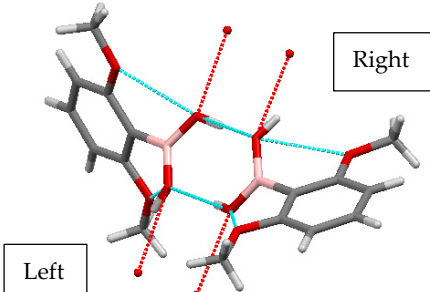   |                                                                                     |    |                                                                                       |
| Conformation in crystal structure                         | Left,<br><i>Syn-anti</i> , non-planar                                               | Right,<br><i>Syn-anti</i> , non-planar                                              | A molecule,<br><i>Anti</i> , non-planar                                              | B molecule,<br><i>Anti</i> , planar                                                   |
| Optimized                                                 |    |    |    |    |
| Torsion angle in opt. structure, deg                      | -12.7                                                                               | -12.0                                                                               | 4.5                                                                                  | 4.6                                                                                   |
| Constrained optimization                                  |  |  |  |  |
| Torsion angle in constr. opt. structure, deg              | -42.1                                                                               | -46.3                                                                               | 59.8                                                                                 | 5.0                                                                                   |
| $\Delta E_{opt}$ , $\text{kJ}\cdot\text{mol}^{-1}$        | 11.6                                                                                | 11.6                                                                                | 0                                                                                    | 0                                                                                     |
| $\Delta E_{constr.opt}$ , $\text{kJ}\cdot\text{mol}^{-1}$ | 15.3                                                                                | 15.1                                                                                | 18.1                                                                                 | 0                                                                                     |
